1     **Epigenome-wide DNA methylation profiling of healthy COVID-19 recoverees reveals a**  
2                                     **unique signature in circulating immune cells**

3     Johanna Huoman, PhD<sup>1\*</sup>, Shumaila Sayyab, PhD<sup>1\*</sup>, Eirini Apostolou, PhD<sup>2</sup>, Lovisa Karlsson,  
4     MSc<sup>1</sup>, Lucas Porcile, BSc<sup>1</sup>, Muhammad Rizwan, MSc<sup>2</sup>, Sumit Sharma, PhD<sup>3</sup>, Jyotirmoy Das,  
5     PhD<sup>1</sup>, Anders Rosén<sup>2</sup>, PhD and Maria Lerm, PhD<sup>1\*\*</sup>

6     \*Shared first authorship

7     \*\*Corresponding author

8

9     <sup>1</sup>Division of Inflammation and Infection, Department of Biomedical and Clinical Sciences,  
10    Linköping University, Linköping, Sweden

11    <sup>2</sup>Division of Cell Biology, Department of Biomedical and Clinical Sciences, Linköping  
12    University, Linköping, Sweden

13    <sup>3</sup>Division of Molecular Medicine and Virology, Department of Biomedical and Clinical  
14    Sciences, Linköping University, Linköping, Sweden

15

16    Corresponding author:

17                                     Maria Lerm, PhD, Professor  
18                                     Department of Biomedical and Clinical Sciences  
19                                     Division of Inflammation and Infection, Lab1, floor 12  
20                                     Faculty of Medicine and Health Sciences  
21                                     SE-581 85 Linköping, Sweden  
22                                     Cell phone: +46-73-2707786  
23                                     Visit us at: <https://liu.se/en/employee/marle69>

24

25 **Word count:** 6070 (2404 without M&M and figure legends)

26 **Figures and tables:** 4 Figures, 12 Supplementary Figures, 8 Supplementary Tables

27 **ORCID-ID:s/Twitter accounts:**

28 Johanna Huoman                    0000-0003-2509-2418                    @HuomanJohanna

29 Shumaila Sayyab                    0000-0002-6048-775X                    @shum\_sayyab

30 Lovisa Karlsson                    0000-0003-2704-1788                    @LovisaElisabet

31 Lucas Porcile                    0000-0002-9164-4113

32 Muhammad Rizwan                    0000-0002-1725-8337

33 Sumit Sharma                    0000-0003-0299-1285

34 Jyotirmoy Das                    0000-0002-5649-4658                    @Jyotirmoy21

35 Anders Rosén                    0000-0001-5082-6423

36 Maria Lerm                    0000-0002-5092-9892                    @LermLab

37

38

39

40

41

42

43

44

45 **ABSTRACT**

46 **Background:** Epigenetic alterations upon microbial challenge have been described as both a  
47 defence strategy and a result of pathogenic manipulation. While most COVID-19 studies  
48 focus on inflammatory and immune-mediated responses, little is known about epigenetic  
49 modifications in response to SARS-CoV-2 infection.

50 **Methods:** Epigenome-wide DNA methylation patterns from COVID-19 convalescents were  
51 compared to uninfected controls from before and after the pandemic. Peripheral blood  
52 mononuclear cell (PBMC) DNA was extracted from uninfected controls, COVID-19  
53 convalescents and symptom-free individuals with SARS-CoV-2-specific T cell-responses, as  
54 well as from PBMCs stimulated *in vitro* with SARS-CoV-2. Subsequently, the Illumina  
55 MethylationEPIC 850K array was performed, and statistical/bioinformatic analyses comprised  
56 differential DNA methylation, pathway over-representation and module identification  
57 analyses.

58 **Results:** Differential DNA methylation patterns distinguished COVID-19 convalescents from  
59 uninfected controls, with similar results in an experimental SARS-CoV-2 infection model. A  
60 SARS-CoV-2-induced module was identified *in vivo*, comprising 66 genes of which six  
61 (*TP53*, *INS*, *HSPA4*, *SPI1*, *ESR1* and *FAS*) were present in corresponding *in vitro* analyses.  
62 Over-representation analyses revealed involvement in Wnt, muscarinic acetylcholine receptor  
63 signalling and gonadotropin-releasing hormone receptor pathways. Furthermore, numerous  
64 differentially methylated and network genes from both settings interacted with the SARS-  
65 CoV-2 interactome.

66 **Conclusions:** Altered DNA methylation patterns of COVID-19 convalescents suggest  
67 recovery from mild-to-moderate SARS-CoV-2 infection leaves longstanding epigenetic  
68 traces. As *in vitro* SARS-CoV-2 infection corroborated *in vivo* exposure results, this indicates

69 DNA methylation is involved in immune cell responses to challenge with this virus. Future  
70 studies should determine whether this reflects host-induced protective antiviral defence or  
71 targeted viral hijacking to evade host defence.

72

73

74

75

76

77

78

79

80

81

82

83

84

85

86

87

88 **Keywords:** COVID-19, DNA methylation, interactome, *in vitro* stimulation, mild-to-  
89 moderate, module identification, network analysis, PBMC, SARS-CoV-2

## 90 INTRODUCTION

91 Since the end of 2019, the Corona virus disease 19 (COVID-19) pandemic has claimed lives  
92 of millions world-wide, highlighting the global challenges in detecting, monitoring, and  
93 treating novel viral infections. While efficacious vaccines are available at present, still a lot  
94 remains to be uncovered regarding underlying mechanisms of the interaction between the  
95 severe acute respiratory syndrome coronavirus 2 (SARS-CoV-2) virus and its host.

96 SARS-CoV-2 is a single stranded enveloped RNA virus belonging to the *Coronaviridae*  
97 family<sup>1</sup>, which similarly to other viruses hijacks host functions for its own advantage.<sup>2-5</sup>

98 Evidence suggest that epigenetic mechanisms, *i.e.* processes regulating transcriptional  
99 accessibility of genomes without altering the nucleic acid sequence, are involved in the  
100 hijacking process.<sup>6, 7</sup> DNA methylation (DNAm) of CpG sites is considered to be the most  
101 stable epigenetic modification, as it ensures heritability throughout cell division, although it is  
102 at the same time highly dynamic in response to environmental stimuli.<sup>8</sup> The malleability and  
103 flexibility of the DNA methylome decreases with increasing age<sup>9</sup>, and environmental factors  
104 such as smoking and nutrition may alter DNAm patterning in various cell types, including  
105 different immune cells.<sup>10, 11</sup> This could have important implications in the course of COVID-  
106 19, as *e.g.* smokers, overweight and elderly patients are more susceptible to become severely  
107 ill if contracting SARS-CoV-2.<sup>12, 13</sup> Furthermore, DNAm patterns may also become altered  
108 upon microbial<sup>14</sup> or viral infection.<sup>15-17</sup> In line with this, we have previously observed that  
109 immune cells of asymptomatic, tuberculosis-exposed individuals carry a lasting DNAm  
110 signature that is linked to protection against mycobacterial infection.<sup>18-20</sup>

111 A majority (40-80%) of individuals infected with SARS-CoV-2 show no or mild symptoms of  
112 COVID-19 and proceed into convalescence thereafter, while a smaller, but non-negligible,  
113 proportion of individuals show severe or life-threatening manifestations.<sup>21, 22</sup> Tolerant  
114 immune responses have been observed in transcriptomic and immune profiling comparisons  
115 of asymptomatic and symptomatic COVID-19 patients<sup>23</sup>, and as epigenetic mechanisms  
116 regulate differentiation of *e.g.* T cells<sup>8</sup>, it is conceivable that epigenetic mechanisms may be  
117 implicated in combating SARS-CoV-2 infection. However, few studies have thus far  
118 addressed whether and how the epigenome is altered in subjects with a recent mild-to-  
119 moderate SARS-CoV-2 infection. In this study, we set out to examine epigenome-wide  
120 DNAm patterns in convalescent COVID-19 (CC19) subjects, after a mild-to-moderate disease  
121 course. Understanding how convalescent individuals have mounted an epigenetic response  
122 against new viruses such as SARS-CoV-2, for which no pre-existent immunity was present,  
123 may reveal how a functional defence strategy towards the virus is prepared, and guide  
124 development of novel diagnostic and preventive measures. Indeed, we found that differential  
125 DNAm patterns separated those who have not been infected with SARS-CoV-2 from those  
126 who have recovered from mild COVID-19, suggesting that epigenetic mechanisms are at play  
127 during SARS-CoV-2 infection. The observations could be replicated in *in vitro* experiments,  
128 further underpinning our findings.

129

130

131

132

133

134

135

136

137

## 138 **MATERIALS AND METHODS**

### 139 **Study population**

140 In this study, participants were enrolled between May 29<sup>th</sup> and July 10<sup>th</sup> 2020 during the first  
141 wave of the SARS-CoV-2 pandemic in Linköping, Sweden. Individuals who had recovered  
142 from and individuals who had not experienced COVID-19 were recruited after  
143 announcements with leaflets. Exclusion criteria were the existence of current active SARS-  
144 CoV-2 infection and/or other infectious disease symptoms, as well as being younger than 18  
145 years. The study participants voluntarily entered the study in a consecutive manner. The study  
146 was conducted on blood and saliva samples from in total 38 individuals from three different  
147 groups (Figure 1); non-infected controls (Con, n=18), COVID-19 convalescents (CC19,  
148 n=14) and symptom-free individuals with SARS-CoV-2-specific T cell responses (SFT, n=6).  
149 Additionally, blood samples from anonymous healthy blood donors from the blood bank at  
150 Linköping University Hospital before 2020 were included as a separate group in the analyses  
151 (pre20, n=5), collected between 2014-2019 prior to the outbreak of the pandemic. CC19  
152 participants presented with either mild or asymptomatic initial infection, and none was  
153 admitted to hospital. Cons were defined as neither having any positive circulating IgG-  
154 antibody or T cell responses to SARS-CoV-2, while CC19s were defined by the presence of  
155 SARS-CoV-2-specific IgG antibodies in plasma using suspension multiplex immunoassay  
156 (SMIA), some of which were positive for IgG in saliva, rapid test and in T cell responses as  
157 well. From the included individuals, the following information was retrieved using health  
158 questionnaires: self-reported COVID-19 symptoms (if applicable, one or several of the

159 following: fever, headache, shortness of breath, loss of smell/taste, cough, fatigue, muscle  
160 pain, nausea, sinusitis/congestion), date of self-reported symptoms, weeks between symptoms  
161 and sampling, age, sex, smoking, weight, height, comorbidities as well as medications. The  
162 blood and saliva from the study participants was processed in a Biosafety level-2 facility. The  
163 present study is an exploratory pilot study on the effects of mild-to-moderate SARS-CoV-2  
164 infection on DNA methylation patterns in PBMCs. The sample size could not be determined  
165 beforehand, as the SARS-CoV-2 infection rate in society was not known at the time of sample  
166 collection. Hence, all individuals fulfilling inclusion criteria, consenting to participation and  
167 providing both blood and saliva samples were included in the study. However, the sample size  
168 is similar to previous studies on the effect of BCG vaccination<sup>18, 24</sup>, where meaningful  
169 differences in DNA methylation upon tuberculosis infection were shown. Likewise, the  
170 belonging to the different groups described above was determined after performance of the  
171 DNA methylation analyses, and hence handling, extraction and experimental procedures  
172 performed on the samples were performed in a blinded fashion. For samples from the natural  
173 exposure cohort, all participants provided written informed consent, and the present study was  
174 approved by the Regional Ethics Committee for Human Research in Linköping (Dnr. 2019-  
175 0618). Regarding the anonymous blood samples used for *in vitro* experiments, informed  
176 consent was given by the healthy donors at the time of blood donation and the use of the  
177 donated blood for research purposes was guaranteed as per the guidelines of Regional Ethics  
178 Committee for Human Research in Linköping and the Helsinki Declaration.

#### 179 **PBMC and plasma isolation from whole blood**

180 Peripheral blood was collected in three 10 ml EDTA tubes (BD Vacutainer, 10331254, Fisher  
181 Scientific, Sweden). Up to 20 ml of whole blood was used for PBMC isolation after Ficoll-  
182 Paque Plus gradient centrifugation (GE17-1440-03, GE Healthcare Life Sciences, Sigma-  
183 Aldrich, Sweden) with SepMate™ tubes (85450, StemCell technologies, France) according



184 to the manufacturer's protocol. Cells were frozen in 10% DMSO (10103483, Fischer  
185 Scientific, Sweden) in fetal bovine serum (FBS) (10270106, Gibco, Fischer Scientific,  
186 Sweden) and kept at -150°C until analysis. After thawing, the cells were washed twice in cell  
187 culture medium (RPMI medium 1640, 31870-025, 10% fetal bovine serum, 1%  
188 penicillin/streptomycin, 15140, 1% L-glutamine, 25030081, all from Gibco, Fischer  
189 Scientific, Sweden) further on termed as complete culture medium, prior to further  
190 processing. Up to 10 ml of whole blood was used for plasma separation by centrifugation  
191 (2000g for 15min, 4°C) and aliquots were stored at -80°C till further analysis.

### 192 **Measurements of SARS-CoV-2-specific T cell responses using ELISpot**

193 Peptides for the spike (S) protein of SARS-CoV-2 were obtained from Mabtech (3629-1,  
194 Sweden) and were reconstituted with di-methyl-sulphoxide (DMSO) at a concentration of 200  
195 µg/ml according to the manufacturer's instructions. The SARS-CoV-2 S1 scanning pool  
196 contains 166 peptides consisting of 15-mers, overlapping with 11 amino acids, covering the  
197 S1 domain of the spike S1 protein (amino acid 13-685). The peptides were combined into one  
198 pool. IFN-γ ELISpot Plus kit was purchased from Mabtech (3420-4HST-10, Sweden).  
199 Briefly, the pre-coated wells were plated with unfractionated PBMCs at counts of 300 000  
200 cells/well, and the cells were cultured with peptides for the S protein of SARS-CoV-2 at a  
201 final concentration of 2 µg/ml (diluted in complete culture medium) for 20 to 22 hrs in a  
202 37°C, 5% CO<sub>2</sub> incubator. Cells cultured with medium alone were used as negative controls.  
203 Stimulation with anti-CD3 antibody at a concentration of 1 µg/ml was used as a positive  
204 control for each subject. Anti-CD28 antibody (3608-1-50, Mabtech, Sweden) was included at  
205 a final concentration of 0.1 µg/ml as a co-stimulator. All experiments were conducted in  
206 duplicates and results represent the mean of the duplicates. The plates were then processed  
207 according to the manufacturer's protocol. Estimation of specific T cell numbers was  
208 expressed as spot-forming cells per 1x10<sup>6</sup> PBMCs (SFC). SFC were counted using an

209 automated reading system (BioSys Bioreader 5000 Pro-F beta, Bio-sys GmbH, Germany) and  
210 assessed with the Bioreader 5000 analyser. A stimulation index was calculated by dividing the  
211 SFC elicited by a SARS-CoV-2 stimulus by the SFC present in the negative control wells. An  
212 increment value was calculated by subtracting the SFC from the negative control wells from  
213 the SFC of the stimulated wells. A stimulus was considered to be positive when the  
214 stimulation index was  $>2$ , and the increment value was  $>10$ .

### 215 **Saliva samples**

216 Prior to saliva collection, participants were required to rinse their mouth with water and  
217 confirmed they did not show documented oral disease or injury, that they had fasted, refrained  
218 from smoking, chewing a gum, taking oral medication, tooth brushing for a minimum of 1  
219 hour before sampling and that no dental work had been performed within 24 hours prior to  
220 sample collection. Donors were asked to provide a 5 ml sample of saliva in a 50 ml sterile  
221 conical tube by passive drooling.

222 All saliva samples were stored/transported on ice upon receipt of the laboratory for processing  
223 to preserve sample integrity. Samples were centrifuged (2500g for 20 minutes at 4°C) to  
224 pellet cells and insoluble matter. The supernatant was collected and samples were  
225 complemented with cOmplete™ protease (#11836170001, Sigma) and Pierce™ phosphatase  
226 inhibitor cocktails (#88667, Thermo Scientific), aliquoted and frozen/stored at -80°C on the  
227 same day. On the day of the assay, samples were thawed and micro-centrifuged (2500g for 10  
228 minutes at 4°C) prior to analysis.

### 229 **Antibody responses in plasma and saliva using Suspension Multiplex Immunoassay** 230 **(SMIA)**

231 MagPlex-C microspheres (Luminex Corp., Austin, TX, USA) were used for the coupling of  
232 antigens according to the manufacturer's protocol as previously described.<sup>25</sup> Briefly, 200 µl of

233 the stock microsphere solution ( $1.25 \times 10^7$  beads/ml) were coupled by adding 10  $\mu$ g of  
234 recombinant SARS-CoV-2 Spike protein RBD His-Tag (#40592-V08B, SinoBiological Inc.,  
235 USA). After the coupling, beads were incubated in phosphate buffered saline (PBS: 0.15 M  
236 sodium chloride, 10 mM sodium phosphate, pH 7.4) containing 0.05% (v/v) Tween 20 (PBS-  
237 T) for 15 min on a rocking shaker at RT. The beads were then washed with 0.5 ml  
238 StabilGuard solution (SurModics, Eden Prairie, MN, USA, #SG01-1000) using a magnetic  
239 separator (Milliplex® MAG handheld magnetic separation block for 96-well plates, Millipore  
240 Corp. Missouri, USA. Cat. #40-285) and resuspended in 400  $\mu$ l of StabilGuard solution. The  
241 coupled beads were stored at 4°C in the dark until further use.

242 For plasma samples, 50  $\mu$ l of plasma diluted 1:1000, and for saliva samples 50  $\mu$ l of sample  
243 diluted 1:2 in PBS-T containing and 1% (v/v) BSA (Sigma-Aldrich Sweden AB, Stockholm,  
244 Sweden, #Sigma-Aldrich-SRE0036) (PBS-T + 1% BSA) was added per well of a flat bottom,  
245 96-well  $\mu$ Clear non-binding microtiter plate (Greiner Bio-One GmbH, Frickenhausen,  
246 Germany, #Greiner-655906). Fifty microliters of a vortexed and sonicated antigen-coupled  
247 bead mixture suspended in PBS-T + 1% BSA (~50 beads/ $\mu$ l) was then added to each well.  
248 The plate was incubated in the dark at 600 rpm for 1h at RT. The wells were then washed  
249 twice with 100  $\mu$ l of PBS using a magnetic plate separator. The beads were resuspended in  
250 100  $\mu$ l of 1  $\mu$ g/ml goat anti-human IgG-PE labelled antibody (Southern BioTech,  
251 Birmingham, AL, USA. Cat. #2040-09) in PBS-T + 1% BSA and incubated for 30 min at RT  
252 in the dark with rotation at 600 rpm. The beads were subsequently washed twice with PBS,  
253 resuspended in 100  $\mu$ l of PBS and analysed in a FlexMap 3D® instrument (Luminex  
254 Corporation, Austin, TX, USA) according to the manufacturer's instructions. A minimum of  
255 100 events for each bead number was set to read and the median value was obtained for the  
256 analysis of the data. All sample analyses were repeated three times. A naked, non-antigen-  
257 coupled bead was included as a blank along with PBS-T + 1% BSA as a negative control.

## 258 ***In vitro* stimulation with SARS-CoV-2**

259 PBMC samples from four healthy blood donors, frozen in 2019 in -150°C in foetal bovine  
260 serum (FBS) with 10% DMSO, were thawed and added to 10 ml of Gibco Dulbecco's  
261 Modified Eagle Medium (DMEM) (Thermo Fisher Scientific, Waltham, US) containing 1%  
262 L-glutamine (Cat no: 25030-024, Gibco, Waltham, Massachusetts, USA), 1% penicillin-  
263 streptomycin (Cat no: 15140148 Gibco) and 10% normal human serum (NHS) (pooled from 5  
264 donors) filtered through a 40 µm strainer and pre-heated to 37°C. The cells were washed two  
265 times by centrifugation at 330g for 10 min. The pellet was resuspended in 1.5 ml medium and  
266 2 million per donor were seeded in six-well plates and incubated for 16-24 h. The cell culture  
267 media were collected, and centrifugated at 330g for 5 min to pellet the non-adherent cells.

268 For *in vitro* infection experiments, SARS-CoV-2 virus previously isolated in a Biosafety level  
269 3 lab according to local safety regulations from the nasopharyngeal aspirate of a COVID-19  
270 patient (early April 2020) was used.<sup>26</sup> The isolated virus was passaged five times in Vero E6  
271 cells and for cell infection experiments, freeze-thawed medium supernatants of 4-5 days  
272 infected cells or mock supernatants were used. Virus titers were determined using  
273 immunoperoxidase assay. In brief, two-day old confluent cells (in a 96-well plate) were first  
274 washed with Dulbecco's Modified Eagle's Medium (DMEM) (Gibco, Code: 13345364)  
275 containing 100 µg/ml gentamicin, and 100 µl of 10-fold serially diluted SARS-CoV-2 virus  
276 lysate was added in quadruplicate. SARS-CoV-2 or mock Vero cell supernatant was added to  
277 the PBMC cultures corresponding to a multiplicity of infection of 0.01. 2 hours post infection  
278 the cells were washed twice with DMEM and 100 µl of fresh DMEM (containing 2% FBS  
279 and 100 µg/ml gentamicin) was added, and the plate was incubated for 8 hours at 37°C in  
280 presence of 5% CO<sub>2</sub>. After incubation, the supernatant was discarded, and the cells were fixed  
281 for 2 hours with 4% formaldehyde. Next, Triton-X (1:500 in phosphate buffered saline, PBS)  
282 was added for 15 min, washed once with PBS and incubated for 2 hours at 37°C with PBS

283 containing 3% BSA. Next, the cells were incubated with mouse-anti-dsRNA antibody  
284 (Scions, Code: J2 at 1:100 dilution) for 1.5 h followed by detection using horseradish  
285 peroxidase–conjugated goat anti-mouse IgG (heavy plus light chain) (Catalog: 1706516, Bio-  
286 Rad Laboratories, Hercules, CA, USA) (1:1000) for 1 h. The plates were washed five times  
287 with PBS between every incubation, all incubations were done at room temperature and the  
288 antibody dilutions were made in PBS containing 1% BSA. Finally, the SARS CoV-2 infected  
289 Vero E6 cells were identified using 3-aminoethylcarbazole (AEC) substrate. The spots  
290 representing virus-infected cells were counted under the light microscope and the virus lysate  
291 was titrated to be  $5 \times 10^6$  per ml.

292 Cells were monitored in the IncuCyte S3 live cell analysis system (Sartorius, Göttingen,  
293 Germany) to allow quantification of cell death in SARS-CoV-2 infected wells versus controls.  
294 After 48h incubation the cell culture media was collected from each well and centrifugated at  
295 330g for 5 min to collect the non-adherent cells. Lysis buffer (RLT from the AllPrep®  
296 DNA/RNA Mini Kit, Qiagen, Hilden, Germany) was added to the wells to lyse adherent cells  
297 and the mixture was then added to the pelleted non-adherent cells in order to collect DNA  
298 (according to the manufacturer's instructions) from the entire PBMC fraction.

## 299 **Epigenome-wide DNA methylation analyses**

### 300 **DNA extraction and quantification**

301 For the performance of epigenome-wide DNA methylation analyses, DNA was extracted  
302 from the above isolated PBMCs (approximately  $2 \times 10^6$  cells) using the AllPrep® DNA/RNA  
303 Mini Kit (Cat no: 80204, Qiagen, Hilden, Germany) according to the manufacturer's  
304 instructions. Concentrations of extracted DNA were measured using the Qubit® 4.0  
305 Fluorometer (Thermo Fisher Scientific, Waltham, Massachusetts, U.S), using dsDNA High

306 Sensitivity (HS) Assay Kit and RNA HS Assay Kit. The measurement was performed  
307 according to the manufacturer's instructions.

### 308 **Illumina MethylationEPIC 850K array**

309 DNA samples were sent to the Bioinformatics and Expression analysis Core facility,  
310 Karolinska Institutet, Stockholm, Sweden, where the samples first went through bisulphite  
311 conversion on site, followed by the performance of the Illumina Infinium MethylationEPIC  
312 850K array. 200 ng of DNA from each sample was analysed.

### 313 **Statistics**

#### 314 **Descriptive analyses on demographic variables**

315 Initial descriptive analyses of demographic variables were performed on the available  
316 information about age, gender, smoking and BMI ( $\text{kg/m}^2$ ). Continuous variables were  
317 compared using an unpaired two-tailed t-test and categorical variables were examined using  
318 the Pearson  $\chi^2$  test or Fisher's exact test (if the number of observations was smaller than five),  
319 see Table S1.

#### 320 **DNA methylation analyses**

321 The resulting raw IDAT-files from the MethylationEPIC array analyses were processed in R  
322 programming environment (version 4.0.2). The analyses described below were identically  
323 performed for the clinical *in vivo* cohort and the *in vitro* experiment, unless stated otherwise.

#### 324 **Pre-processing and quality control**

325 The resulting raw IDAT-files containing the raw DNA methylation profiles for each cell type  
326 were analysed in R (version 4.0.2) using the minfi package<sup>27</sup> (version 1.36.0) and the data  
327 were pre-processed in several steps. The following filters were applied: i) removal of probes

328 with detection p-values above 0.01, ii) removal of non-CpG probes, iii) removal of multi-hit  
329 probes, iv) removal of all probes in X and Y chromosomes.

### 330 *In vivo*

331 We removed the sex chromosomes from our data set, as female X-inactivation skews the  
332 distribution of beta values (Figure S1). Of the initial 865 918 probes, 841 524 probes  
333 remained upon filtering. After filtering, quality control was performed, and normalisation of  
334 the data was done with subset-quantile within array (SWAN) normalisation method.<sup>28</sup> The  $\beta$ -  
335 values and M-values of the samples were calculated against each probe per sample. The  
336 quality of the data was assessed before and after the normalisation (Figure S2). Thereafter, we  
337 performed singular value decomposition (SVD) analyses using the ChAMP package<sup>29</sup>  
338 (version 2.19.3) to identify underlying components of variation within the filtered and  
339 normalised data set (Figure S3). Significant components consisted of slide, batch and sample  
340 groups that contributed to variation within the data set. Corrections were performed for the  
341 identified components using ComBat from the SVA package<sup>30</sup> (version 3.38.0). As PBMCs  
342 consist of multiple nucleated cell types in peripheral blood, we utilised the Houseman method  
343 to infer cell type proportions within the samples.<sup>31</sup> No differences could be determined in cell  
344 type proportions between any of the individuals or between sample groups (Table S2),  
345 motivating our choice of not correcting for these cell type proportions.

### 346 *In vitro*

347 In this dataset, we did not have any information on demographic variables, as the samples  
348 derived from anonymous donors. However, we still removed the sex chromosomes from our  
349 data set, as female X-inactivation skews the distribution of beta values. Of the initial 861 728  
350 probes, 837 694 probes remained upon filtering. After filtering, quality control was  
351 performed, and normalisation of the data was done with SWAN normalisation method.<sup>28</sup> The

352 Houseman method was utilised to infer cell type proportions within the samples<sup>31</sup>, yet again  
353 revealing no differences could be determined in cell type proportions between any of the  
354 individuals (Table S2), motivating our choice of not correcting for these cell type proportions.  
355 The  $\beta$ -values and M-values of the samples were calculated against each probe per sample. The  
356 quality of the data was assessed before and after the normalisation (Figure S4). SVA package  
357 (version 3.40) was applied to correct the batch effect. Cell deconvolution was performed  
358 using FlowSorted.Blood.EPIC package (version 1.11).

### 359 **Differential DNA methylation analysis**

#### 360 *In vivo*

361 As we were interested in studying CpGs that were differentially methylated between CC19s  
362 and non-infected controls from both before and after the start of the COVID-19 pandemic, we  
363 performed differential DNA methylation analyses, using the limma package (version 3.46.0).  
364 A linear model was fitted to the filtered, normalised and SVD-corrected DNA methylation  
365 data. Identified sources of variation that were still present upon SVD correction provided the  
366 basis for the inclusion of these variables as co-variates in the models, in this case gender and  
367 BMI (Figure S3). For each investigated probe, moderated t-statistics, log<sub>2</sub> Fold Change  
368 (logFC) and p-values were computed. The logFC values represent the average beta  
369 methylation difference (from hereon referred to as mean methylation difference, MMD)  
370 between the CC19s vs. non-infected controls (Cons + Pre20). Differentially methylated CpGs  
371 (DMCs) were defined as CpG sites having a nominal p-value of less than 0.01 along with an  
372 MMD of > 0.2. As a means to ascertain the quality of the identified DMCs, genomic inflation  
373 and pertaining bias were estimated using the BACON package<sup>32</sup> (version 1.18.0). As the  
374 estimated genomic inflation for the comparison was close to 1 (genomic inflation: 1.20, bias:  
375 0.01, Figure S5), this suggested that no major genomic inflation was present in the  
376 comparisons, and no correction for this was deemed necessary. The distribution of the DMCs



377 among all investigated DNA methylation sites were illustrated by creating volcano plots  
378 (EnhancedVolcano, version 1.8.0). Thereafter, the DMCs were mapped to their corresponding  
379 DMGs. DMGs contained at least one DMC, and were considered hyper- or hypomethylated if  
380 all DMCs within the gene were hyper- or hypomethylated, respectively. If both hyper- and  
381 hypomethylated genes were present in the same gene, the gene was considered having a  
382 mixed methylation pattern.

### 383 ***In vitro***

384 To evaluate the difference between the mock and infected samples, the fold change was  
385 calculated using the cut-off obtained from the density plot (M-value  $>|2|$ ; Figure S6) for each  
386 CpG site. Only those CpGs with higher values than the cut-off, were selected for further  
387 analysis. Venn analysis was performed among the samples using the ggVennDiagram  
388 (version 1.1) package in R (version 4.0.3) and bioconductor (version 3.12).

### 389 **Pathway over-representation analyses**

390 To make biological sense of the putatively SARS-CoV-2-induced DNA methylation  
391 differences, we performed PANTHER pathway over-representation test analyses using the  
392 PANTHER database (version 16.0). The Fisher's exact test was used for generation of  
393 nominal p-values (significance level set to p-value of  $< 0.05$ ), in case false discovery rate  
394 correction was too stringent. The significantly enriched pathways were displayed in dot plots  
395 generated in R using ggplot2 package (version 3.3.3).

### 396 **Network analyses**

397 Network analyses were conducted to generate further and wider biological insight about the  
398 DMGs generated in the *in vivo*. An input object was constructed using the pre-2020 (Pre20,  
399 n=5) and post-2020 (Con, n=18) non-exposed controls and COVID-19 convalescents (CC19,  
400 n=14), as a two-column data frame containing gene annotation and P-value of the significant

401 DMGs (n=54). The graph clustering algorithm MCODE<sup>33</sup> was used to identify molecular  
402 complexes and create a large disease module, which was then fitted to a protein-protein  
403 interaction network, and both were analysed and rendered in Cytoscape (version 3.8.0). High  
404 confidence interactions with a STRINGdb confidence value >0.7 were displayed in the  
405 network. Centrality measurements of degree, betweenness and closeness were used to expose  
406 the most central nodes in the network. Finally, a functional enrichment of the genes present  
407 within the module was carried out using StringDB.<sup>34</sup> In addition, the inference of modules  
408 was performed with two other methods from the MODifieR package (DIAMOnD and  
409 WGCNA)<sup>35</sup> to study whether it was possible to condense the module genes to fewer genes of  
410 particular interest within the network, for both the *in vivo* and the *in vitro* setting.

#### 411 **Overlap to SARS-CoV-2 interactome**

412 A publicly available protein-protein interaction (PPI) network of SARS-COV-2 and human  
413 genes curated by BioGRID (version 4.4.197) was downloaded from the Network Data  
414 Exchange in Cytoscape (version 3.8.0). The DMGs from the *in vivo* and *in vitro* setting  
415 alongside the gene list from the module generated by MCODE were overlapped onto the PPI  
416 network to visualise their respective distributions.

417

418

419

420

421

422

423

424

425

426

427

428

## 429 **RESULTS**

### 430 **COVID-19 convalescents display altered DNAm patterns compared to non-infected** 431 **controls**

432 We compared epigenome-wide DNAm patterning in peripheral blood mononuclear cells  
433 (PBMC) from non-infected controls (Con, n=19), COVID-19 convalescents who had  
434 recovered from mild or moderate symptoms (CC19, n=14), donor blood collected before the  
435 pandemic (Pre20, n=5) and from asymptomatic individuals presenting with SARS-CoV-2-  
436 specific T cell responses (SFT, n=6, Figure 1). Comparisons of demographic variables  
437 revealed no significant differences between any of the groups (Table S1). To examine any  
438 inherent differences in the DNA methylome between the different sample groups, principal  
439 component analyses (PCA) were performed. Three principal components (PC) were identified  
440 as both contributing to the variation within the DNAm data and correlating with the sample  
441 groups (Figure S7). A three-dimensional illustration of these three most contributing  
442 components revealed that the CC19 subjects are distinct from the Con, Pre20 and SFT  
443 subjects, whose centroids clustered more closely together (Figure 2a, Figure S8). The  
444 observed methylome-wide differences prompted us to identify differentially methylated CpGs  
445 (DMCs), which we defined as CpG sites with a nominal p-value of  $<0.01$  along with a mean  
446 methylation difference (MMD) of  $>0.2$ . We found 87 DMCs, when comparing the DNA

447 methylomes of CC19s to the merged groups of Cons and Pre20s (Figure 2b, Table S3a). This  
 448 identified DMC signature could furthermore distinguish the CC19s from Cons, Pre20s and  
 449 SFTs (Figure 2c), suggesting that a past SARS-CoV-2 infection may have resulted in  
 450 modulation of the epigenome that persists at least a couple of months after the virus is  
 451 eliminated from the body.

452

453 **Figure 1. Outline of included participants, experimental procedures as well as statistical**  
 454 **and bioinformatic approaches utilised in the present study.**

*Study participants*

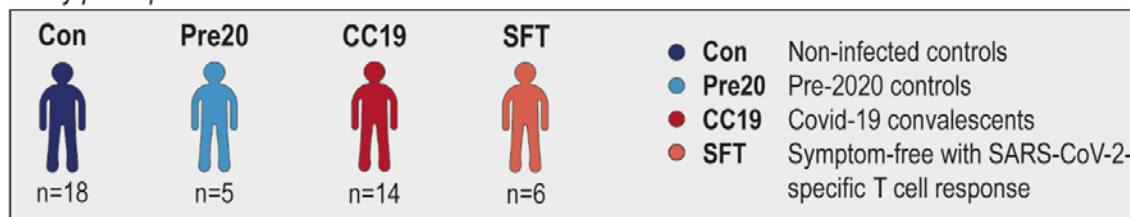

*Experimental procedure*

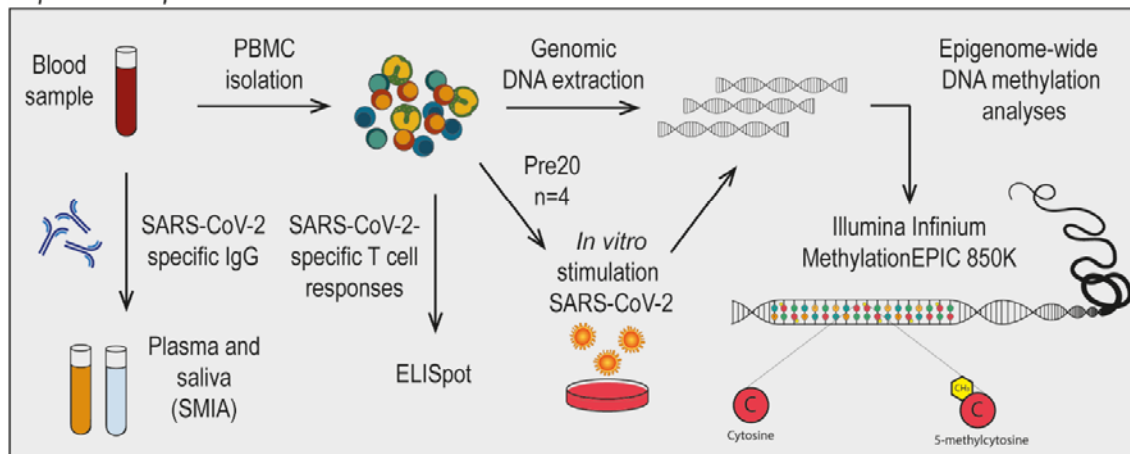

*Statistics and bioinformatics*

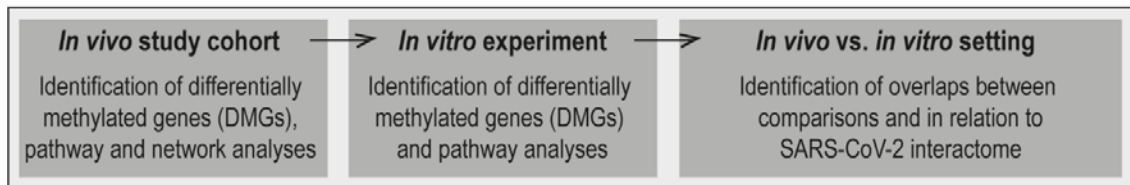

455

456 **Figure 1.** A brief overview of the present study. CC19 – convalescent COVID-19, Con – non-infected  
 457 control, DMG – differentially methylated gene, Pre20 – Pre-2020 non-infected control, SFT –

458 symptom-free individuals with SARS-CoV-2-specific T cell response, SMIA – suspension multiplex  
459 immunoassay.

460

461 Interestingly, a majority of CC19s showed positive SARS-CoV-2-specific IgG responses both  
462 in the circulation and in saliva (Figure 2c). Individuals who showed T cell responses towards  
463 SARS-CoV-2 or presented with SARS-CoV-2-specific antibodies in saliva while being  
464 negative for antibodies in plasma, aligned with the uninfected controls in the PCA and  
465 unsupervised clustering analyses (Figure 2b-c).

466 **Figure 2. Principal component and differential DNAm analysis of PBMC DNA**  
467 **methylomes in COVID-19 convalescents and uninfected controls.**

468 **A**

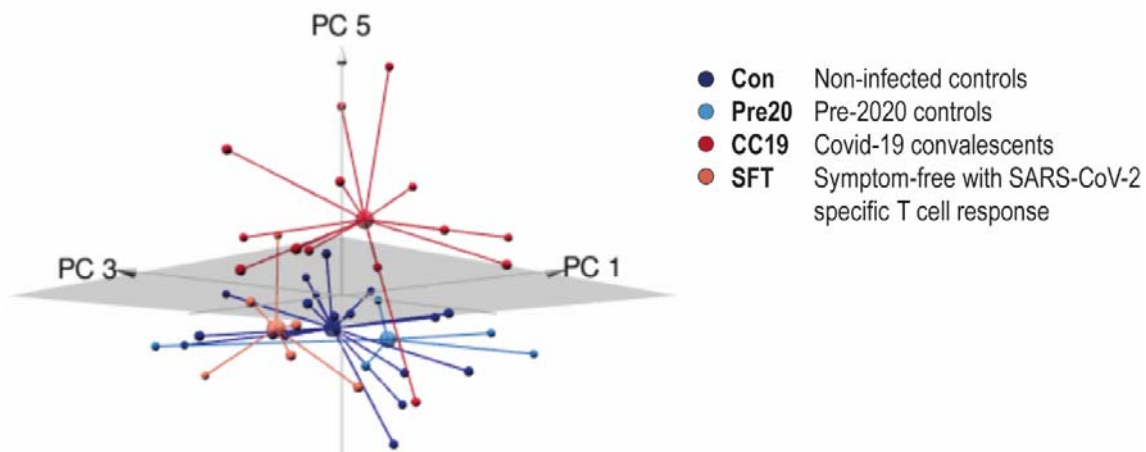

469 **B**

470

471

472

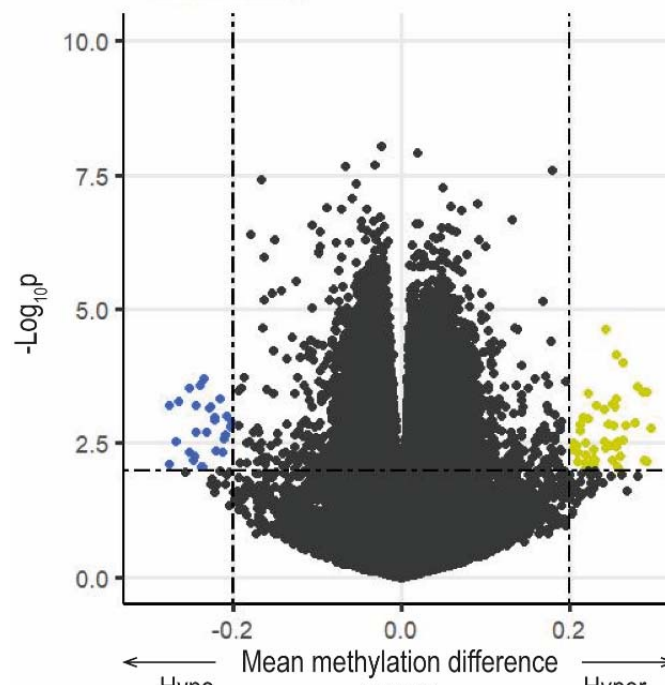

473

474

475

476 C

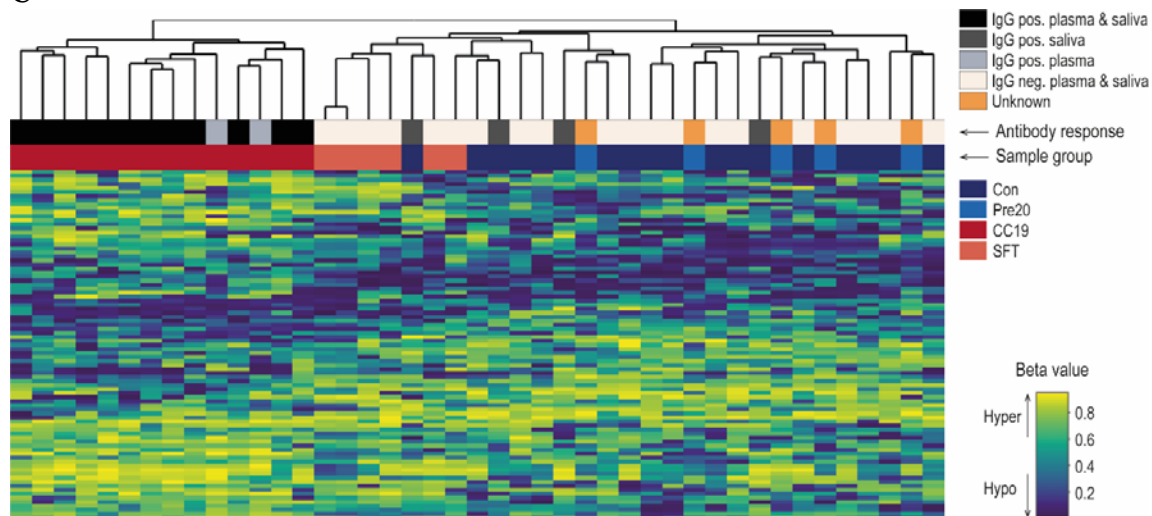

477

478 **Figure 2.** Upon filtering and normalisation, the DNAm data were subjected to PCA. Panel A shows a  
479 3D-PCA plot of principal components (PC)1, PC3 and PC5, where the group means are illustrated as  
480 centroids. DMCs were identified comparing CC19s to Cons and Pre20s by computing a linear model  
481 on the DNAm data. Panel B illustrates a volcano plot of the CC19 vs. Con + Pre20 DNAm data. The  
482 dash-dotted horizontal line represents a nominal p-value cut-off of 0.01, and the vertical lines  
483 represent a cut-off in mean methylation difference (MMD) in CC19 vs. Con + Pre20 of  $> \pm 0.2$ . Panel  
484 C shows a heatmap representing an unsupervised hierarchical clustering analysis of individual  $\beta$   
485 values of the 87 identified DMCs in B. The individuals' antibody status is indicated as a grey-scale  
486 (unknown = anonymous Pre20 blood donors, orange).

487

## 488 **Differential methylation of COVID-19 convalescents identifies a putatively SARS-CoV- 489 2-induced module**

490 To further explore the biological impact of SARS-CoV-2 exposure in the CC19 subjects, the  
491 identified DMCs were annotated to their respective differentially methylated genes (DMG),  
492 resulting in 54 unique genes (Table S3b). Subsequent pathway over-representation analyses  
493 revealed involvement in two significantly over-represented pathways (Wnt and integrin  
494 signalling pathways, Table S4).

495 As a means to elaborate on the wider interaction context in which the DMGs act with other  
496 proteins, the DMGs (n=54) were used as seed genes in the identification of SARS-CoV-2-  
497 induced modules in network analyses. The resulting module consisted of 66 genes from the  
498 protein-protein interaction network, with 139 interactions, which is significantly more  
499 interactions than expected (34 interactions) for a network of that size (Figure 3, Table S5). Six  
500 of these genes were present in at least two module identification methods (*INS*, *HSPA4*, *SP1*,  
501 *ESR1*, *TP53* and *FAS*), and they were all located in the centre of the module. The four genes

502 **Figure 3. Network illustration of SARS-CoV-2-induced module genes from the *in vivo***  
503 **comparison.**

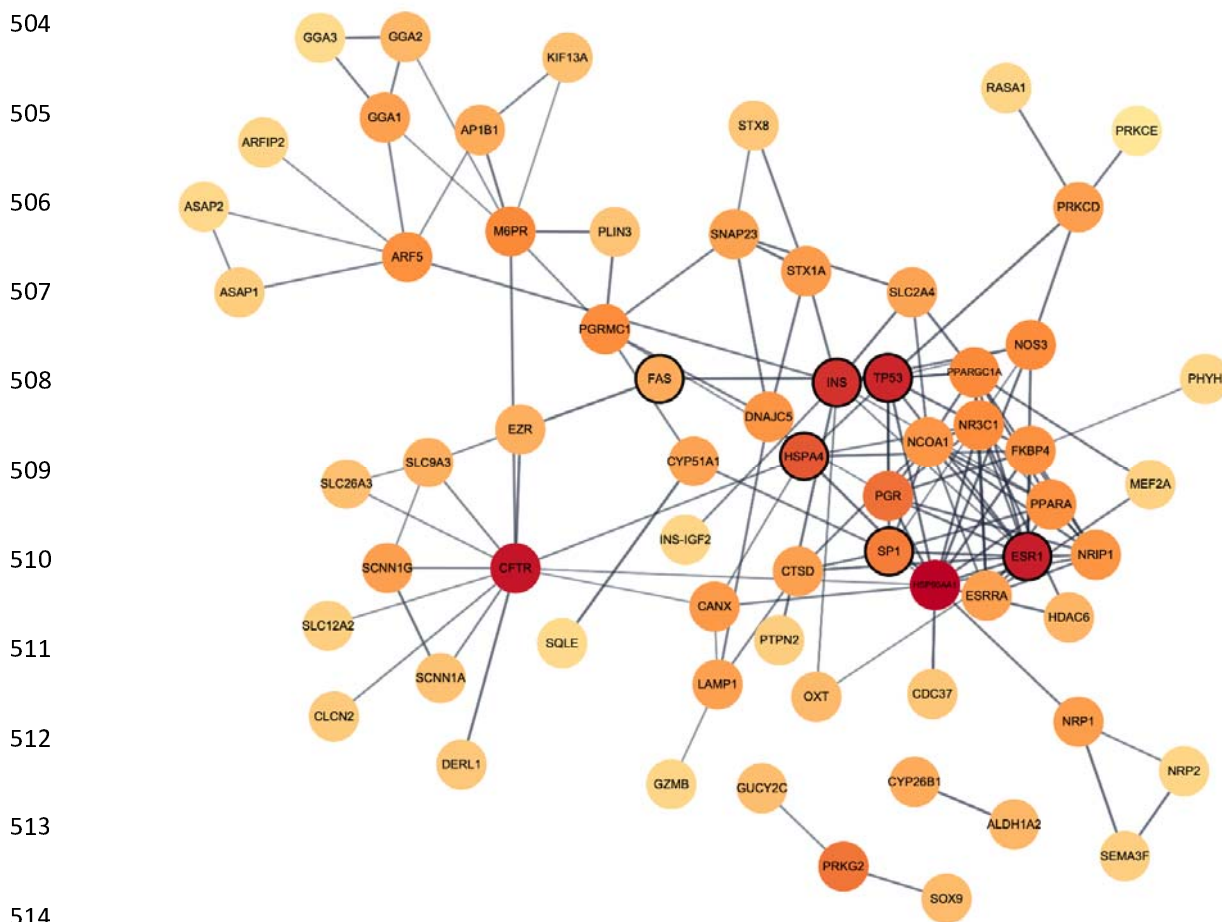

515 **Figure 3.** A network module constructed by means of the graph clustering algorithm MCODE with the 54  
516 DMGs from the *in vivo* setting as input. Nodes (n=66) represent genes and connecting lines represent high-  
517 confidence protein-protein interactions within the network (STRING combined score > 0.7). Combined ranked

518 scores of centrality quantification of degree, betweenness and closeness is visualised as a colour (light orange to  
519 dark red) continuum, with dark red nodes constituting the most central parts of the network. Nodes that were also  
520 found both when utilising two other module identifying methods (DIAMOND and WGCNA) and when  
521 performing the same analyses on the *in vitro* data set using MCODE are enclosed with a black line.

522 with the highest combined centrality scores were *HSP90AA1*, *TP53*, *INS* and *CFTR*. Pathway  
523 over-representation analyses of the 66 module genes revealed involvement in pathways such  
524 as apoptosis signalling, muscarinic acetylcholine receptor 1 and 3 signalling and  
525 gonadotropin-releasing hormone receptor pathway (Figure S9).

## 526 SARS-CoV-2 stimulated PBMCs *in vitro* reveal overlaps with *in vivo* differential 527 methylation, network analyses and SARS-CoV-2 interactome

528 In the present study, we only had access to self-reported time-after-onset of COVID-19  
529 symptoms (Table S6), thus making the immediate effects of SARS-CoV-2 exposure on the  
530 epigenome impossible to analyse. Moreover, as the virus-induced DNAm patterns in the  
531 CC19's may fade over time, we set out to examine SARS-CoV-2-induced DNAm patterns in  
532 an *in vitro* setting. To this end, we exposed PBMCs collected from blood donors in 2019 to  
533 SARS-CoV-2 at a low multiplicity of infection for 48h to mimic immediate *in vivo* exposure

### 534 Figure 4. Differential DNAm analyses of PBMCs stimulated *in vitro* with SARS-CoV-2.

535

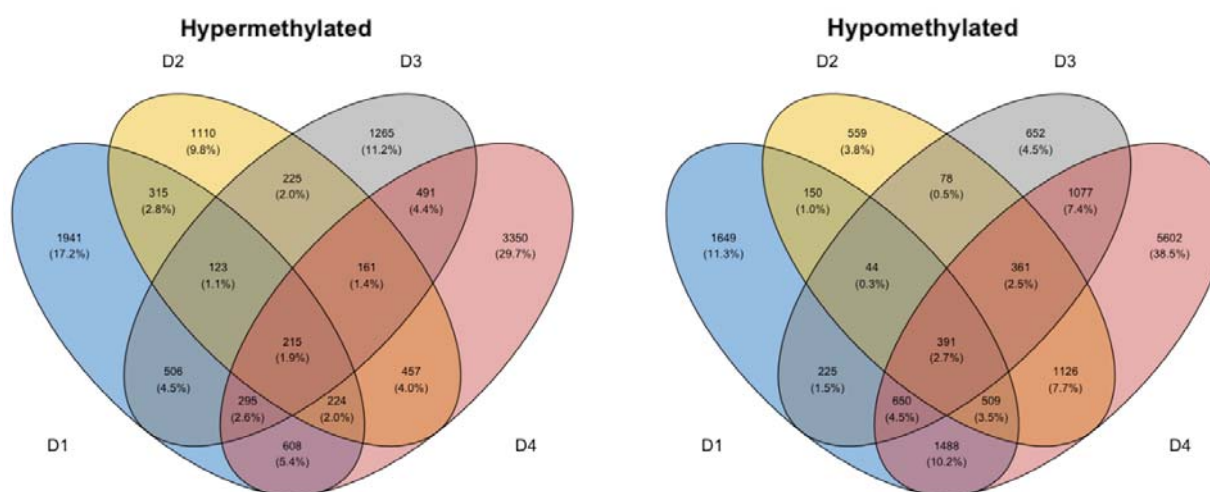

536 **Figure 4.** Venn diagrams depicting the overlap of DMCs from the SARS-CoV-2 *in vitro* stimulated PBMCs.  
537 Intra-individual comparisons of differential DNAm were performed in treated vs. untreated PBMCs from four  
538 different blood donors (D1-D4) collected before the start of the COVID-19 pandemic (2014-2019). DMCs were



539 defined as a fold change in M-value  $>|2|$ . These DMCs were further mapped to their corresponding annotated  
540 genes (DMGs, n=542).

541 to the virus (Figure S10). Exploring the intra-individual DNAm differences between  
542 stimulated and unstimulated cells, a set of DMCs (n=3693, Figure 4) were identified to be  
543 shared between all four individuals (Table S7a-b). These DMCs mapped to in total 606  
544 DMGs (542 unique genes, Table S7c), which were significantly over-represented in a number  
545 of pathways including several glutamate receptor pathways, muscarinic acetylcholine receptor  
546 1 and 3 signalling pathway, as well as the Wnt and cadherin signalling pathways (Figure S11).

547 As similar pathways were revealed in the findings from the *in vivo* study and the SARS-CoV-  
548 2 stimulations, we wanted to explore further similarities in DNAm between the *in vivo* and *in*  
549 *vitro* settings. Analyses of the overlap of shared DMGs identified in the two comparisons  
550 revealed eight overlapping DMGs (*OR12D3*, *PCSK6*, *INPP5A*, *RAD51B*, *CDH4*, *PHACTR3*,  
551 *CDH13*, *SFTA2*). Additionally, to understand the biological context of the genes identified in  
552 the *in vitro* comparison, we performed network analyses in the same manner as for the *in vivo*  
553 comparison. These analyses found a module consisting of six genes (*TP53*, *INS*, *HSPA4*, *SPI1*,  
554 *ESR1* and *FAS*), which were among the previously identified module genes from the *in vivo*  
555 setting and were also identical to those that had been identified by more than two module  
556 identification methods (Figure 3). Furthermore, explorations of the overlap between identified  
557 genes in the differential DNAm analyses and network module analyses to the genes from a  
558 publicly available SARS-CoV-2 interactome identified numerous interactions in the *in vivo*  
559 (n=11/54), *in vitro* (n=100/542) and network module setting (n=33/66) (Figure S12, Table  
560 S8).

561

562

563

564

565

## 566 **DISCUSSION**

567 The epigenetic events triggered during a mild COVID-19 disease course are largely  
568 unexplored, despite the fact that these individuals make up a majority of all SARS-CoV-2-  
569 infected individuals. The main finding of our study was an observed DNAm signature that  
570 was evident several months after recovery in CC19s compared to non-infected individuals.  
571 Although this has not, to our knowledge, previously been described, further investigations  
572 need to prove whether this particular signature is a remnant from the time of active infection.  
573 Studies of DNA methylomes in circulating cells of COVID-19 patients have so far focused on  
574 the hospitalisation phase for moderate-to-severe disease or at discharge<sup>36-40</sup>, and none of these  
575 studies report comparisons upon convalescence from a mild-to-moderate disease course. Not  
576 surprisingly, most of these studies mainly identify engagement of several antiviral immune-  
577 related pathways as well as inflammatory responses in severely ill COVID-19 patients  
578 compared to controls.<sup>39, 40</sup> In contrast, our pathway over-representation analyses revealed the  
579 involvement of distinct, previously unappreciated pathways such as the Wnt signalling and  
580 the muscarinic acetylcholine receptor 1 and 3 signalling pathways. The Wnt signalling  
581 pathway has been implicated in several aspects of COVID-19, including development of  
582 inflammation, cytokine storms, as well as pulmonary fibrosis.<sup>41</sup> Furthermore, potential viral  
583 hijacking of host Wnt targets has been suggested upon SARS-CoV-2 infection in multi-omics  
584 studies.<sup>42</sup> The muscarinic acetylcholine receptor 1 and 3 signalling pathway was present in the  
585 module identification analyses from both the natural *in vivo* exposure and the *in vitro*  
586 stimulations. Interestingly, in post-viral fatigue patients, including post-SARS-CoV and  
587 myalgic encephalomyelitis/chronic fatigue syndrome patients, this signalling pathway is  
588 dysfunctional, which has been tentatively attributed to the development of anti-muscarinic

589 receptor autoantibodies.<sup>43, 44</sup> Although this was not investigated in our study, this could  
590 suggest that these pathways found may be implicated in the development of post-acute  
591 COVID-19 syndrome, as the effects we observe have persisted for months after the initial  
592 exposure to the virus.

593 In the present study, DNA methylome analysis of PBMCs identified a number of genes that  
594 were shared between the natural *in vivo* infection and following *in vitro* stimulation, which  
595 were further confirmed by several module identification methods. One of these genes was  
596 tumour protein 53 (TP53), an evolutionarily conserved protein that is one of the most well-  
597 studied hub genes in cell signalling due to its central role in cancer.<sup>45</sup> TP53 has in several  
598 other studies previously been identified as a hub gene, in whole blood from  
599 COVID-19 patients<sup>46</sup>, and been shown to interact with ACE2 in SARS-CoV-2-infected  
600 human induced pluripotent stem cell-derived cardiomyocytes.<sup>47</sup> Moreover, transcriptomic  
601 analyses of PBMCs from a small group of patients infected with SARS-CoV-2 revealed  
602 involvement of apoptosis and p53 signalling pathways<sup>48</sup>, a finding that was further supported  
603 by studies of the SARS-CoV-2 interactome, where TP53 was identified as a central player in  
604 apoptosis-mediated pathways.<sup>49</sup> Two additional genes, both members of the heat shock  
605 protein family, *HSP90AA1* and *HSPA4* stand out in the network derived from our *in vivo* and  
606 *in vitro* data. Interestingly, reports on differentially expressed genes overlapping between  
607 acute respiratory distress syndrome and venous thromboembolism datasets identified *TP53*  
608 and *HSP90AA1* as central genes, among the top ranked hub genes in their networks.<sup>50</sup>  
609 *HSP90AA1* was previously shown to be upregulated in bronchial cells of patients with mild  
610 COVID-19 disease, as compared to those with a severe disease course<sup>51</sup>, suggesting that this  
611 gene may be of particular importance in the mounting of a protective antiviral response.  
612 Although our study does not provide any evidence for a protective role of the observed  
613 epigenetic alterations, HSP70 family members have been discussed as both anti-viral defence

614 components<sup>52, 53</sup>, as well as anti-viral drug targets, against SARS-CoV-2.<sup>54</sup> Altogether, our  
615 findings on the network centrality of the hub genes that we derived from the *in vivo* and *in*  
616 *vitro* data suggests that they may be of particular importance in the interaction with  
617 epigenetically modulated genes upon SARS-CoV-2 infection. Nevertheless, further studies  
618 are needed to elucidate the mechanistic role of these genes during infection and recovery from  
619 COVID-19.

620 A limitation of the study is the lack of validation of the DNAm findings on a transcriptional  
621 level. Hence, whether the observed DNAm patterns are indeed associated or causally linked to  
622 host protective or host detrimental immune responses still needs to be addressed in future  
623 studies, with more well-designed, larger cohorts and consecutive sample materials from the  
624 onset of SARS-CoV-2 infection. The investigation of epigenetic modifications in mild-to-  
625 moderately ill COVID-19 patients enabled us to discern DNAm differences that otherwise  
626 would have been masked by overriding inflammatory responses. Though these subtle changes  
627 may not primarily be relevant to immune response severity towards SARS-CoV-2, they may  
628 be insightful for the identification of both effective host protective mechanisms at play, or  
629 ensuing deliberating conditions such as long-COVID. The presentation of longstanding  
630 symptoms in long-COVID could be attributed to detrimental alterations in DNAm patterns,  
631 though originally triggered as a short-term anti-viral response.

632 In conclusion, we found epigenome-wide differences in DNAm patterns of individuals that  
633 had recovered from a mild-to-moderate disease course of COVID-19 compared to non-  
634 infected controls. This study suggests that DNAm is one of several epigenetic mechanisms  
635 that is altered upon SARS-CoV-2 infection, and further investigations should elaborate on  
636 whether they are induced by protective host responses or constitute virally-induced hi-jacking  
637 processes. Pinpointing these matters will aid the development of efficacious diagnostic tools  
638 and treatments of COVID-19 in the future.

639

640

## 641 **ACKNOWLEDGMENTS**

642 We would like to thank the Bioinformatics and Expression analysis Core facility at  
643 Karolinska Institutet for their fruitful collaboration and the performance of the Illumina  
644 Infinium MethylationEPIC 850K arrays described in this paper. Additionally, we  
645 acknowledge the Swedish National Infrastructure for Computing (SNIC) at National  
646 Supercomputing Centre (NSC), Linköping University for the computing systems  
647 enabling the data handling, partially funded by the Swedish Research Council (Grant  
648 No. 2018-05973).

## 649 **DECLARATIONS OF INTEREST STATEMENT**

650 M.L., S.Sa. and J.D. have prepared and filed a patent based on the findings from the present  
651 study. None of the remaining authors declare any competing interests.

## 652 **FUNDING**

653 This work was supported by the Swedish Heart and Lung Foundation under grants 20200319,  
654 20200067 and 20210067 (M.L.); the Swedish Research Council under grant Covid-19/biobank  
655 210202#1 (A.R.) and the Open Medicine foundation under grant OMF190626 (A.R.).

## 656 **AVAILABILITY OF DATA AND MATERIALS**

657 The datasets used and/or analysed in the presented work will be available upon publication on  
658 GeneExpression Omnibus, due to a pending patent application. The datasets comprise filtered  
659 and preprocessed DNA methylation data from deidentified individual samples in the study.  
660 The dataset will until publication be available using a secure token, provided by the authors  
661 upon request. Please, refer to GEO-ID: GSE178962 for further information on the data set.

662 Utilised scripts for performing the described statistical analyses within the paper, as well as  
663 for creating graphs, will be available on the following GitHub account upon publication  
664 (<https://github.com/Lerm-Lab/Covid19>).

## 665 **AUTHOR CONTRIBUTIONS**

666 *Conceptualisation:* M.L. – equal, A.R. – equal, *Data curation:* S.Sa. – lead, J.D. – support,  
667 J.H. – support, *Formal analysis:* S.Sa. – lead, J.D. – support, L.K. – support, L.P. – support,  
668 J.H. – support, *Funding acquisition:* M.L. – equal, A.R. – equal, *Investigation:* E.A. – equal,  
669 M.R. – equal (ELISpot/SMIA), M.L. – equal, L.K. – equal, S.Sh. – support (*in vitro* SARS-  
670 CoV-2 stimulation of PBMCs), L.K. – lead (DNA extraction PBMC samples), *Methodology:*  
671 M.L. – equal, L.K. – equal, A.R. – equal, E.A. – equal, M.R. – equal, *Project administration:*  
672 M.L. – equal, A.R. – equal, J.H. – equal, S. Sa. – equal, *Resources:* A.R. – equal, M.L. – equal,  
673 *Software:* S.Sa. – lead, J.D. – support, L.K. – support, L.P. – support, *Supervision:* M.L. –  
674 equal, A.R. – equal, J.H. – equal, S. Sa. – equal, *Validation:* Not applicable, *Visualisation:*  
675 S.Sa. – equal, J.H. – equal, L.K. – support, J.D. – support, L.P. – support, *Writing – original*  
676 *draft:* J.H. – lead, all other authors – support, *Writing – review and editing:* J.H. – lead, all  
677 other authors – support.

678

679

680

681

682

683

684

685

686

## 687 REFERENCES

- 688 1. Atlante S, Mongelli A, Barbi V, Martelli F, Farsetti A, Gaetano C. The epigenetic implication in  
689 coronavirus infection and therapy. *Clinical Epigenetics*. 2020;12(1):156.
- 690 2. O'Donoghue SII, Schafferhans A, Sikta N, *et al*. SARS-CoV-2 structural coverage map reveals  
691 viral protein assembly, mimicry, and hijacking mechanisms. *Molecular systems biology*.  
692 2021;17(9).
- 693 3. Zhang Y, Guo R, Kim SH, *et al*. SARS-CoV-2 hijacks folate and one-carbon metabolism for  
694 viral replication. *Nature communications*. 2021;12(1):1676.
- 695 4. Singh KK, Chaubey G, Chen JY, Suravajhala P. Decoding SARS-CoV-2 hijacking of host  
696 mitochondria in COVID-19 pathogenesis. *American Journal of Physiology-Cell Physiology*.  
697 2020;319(2).
- 698 5. Menachery VD, Schäfer A, Burnum-Johnson KE, *et al*. MERS-CoV and H5N1 influenza virus  
699 antagonize antigen presentation by altering the epigenetic landscape. *Proceedings of the  
700 National Academy of Sciences*. 2018;115(5).
- 701 6. Salgado-Albarrán M, Navarro-Delgado EI, Del Moral-Morales A, *et al*. Comparative  
702 transcriptome analysis reveals key epigenetic targets in SARS-CoV-2 infection. *NPJ systems  
703 biology and applications*. 2021;7(1):21.
- 704 7. Oriol-Tordera B, Berdasco M, Llano A, *et al*. Methylation regulation of Antiviral host factors,  
705 Interferon Stimulated Genes (ISGs) and T-cell responses associated with natural HIV control.  
706 *PLoS pathogens*. 2020;16(8).
- 707 8. Schmidl C, Delacher M, Huehn J, Feuerer M. Epigenetic mechanisms regulating T-cell  
708 responses. *The Journal of allergy and clinical immunology*. 2018;142(3):728-43.
- 709 9. Mueller AL, McNamara MS, Sinclair DA. Why does COVID-19 disproportionately affect older  
710 people? *Aging*. 2020;12(10):9959-81.
- 711 10. Martin EM, Fry RC. Environmental Influences on the Epigenome: Exposure-Associated DNA  
712 Methylation in Human Populations. *Annual Review of Public Health*. 2018;39(1):1-25.
- 713 11. Öst A, Lempradl A, Casas E, *et al*. Paternal diet defines offspring chromatin state and  
714 intergenerational obesity. *Cell*. 2014;159(6):1352-64.
- 715 12. Booth A, Reed AB, Ponzio S, *et al*. Population risk factors for severe disease and mortality in  
716 COVID-19: A global systematic review and meta-analysis. *PloS one*. 2021;16(3).
- 717 13. Taylor EH, Marson EJ, Elhadi M, *et al*. Factors associated with mortality in patients with  
718 COVID-19 admitted to intensive care: a systematic review and meta-analysis. *Anaesthesia*.  
719 2021;76(9):1224-32.
- 720 14. Qin W, Scicluna BP, van der Poll T. The Role of Host Cell DNA Methylation in the Immune  
721 Response to Bacterial Infection. *Frontiers in immunology*. 2021;12:696280.
- 722 15. Schäfer A, Baric R. Epigenetic Landscape during Coronavirus Infection. *Pathogens*.  
723 2017;6(1):8.
- 724 16. Sen R, Garbati M, Bryant K, Lu Y. Epigenetic mechanisms influencing COVID-19. *Genome*.  
725 2021;99(999):1-14.
- 726 17. Chlamydas S, Papavassiliou AG, Piperi C. Epigenetic mechanisms regulating COVID-19  
727 infection. *Epigenetics*. 2020:1-8.
- 728 18. Das J, Idh N, Pehrson I, Paues J, Lerm M. A DNA methylome biosignature in alveolar  
729 macrophages from TB-exposed individuals predicts exposure to mycobacteria. *MedRxiv : the  
730 preprint server for health sciences*. 2021.
- 731 19. Karlsson L, Das J, Nilsson M, *et al*. A Differential DNA Methylome Signature of Pulmonary  
732 Immune Cells from Individuals Converting to Latent Tuberculosis Infection. *MedRxiv : the  
733 preprint server for health sciences*. 2021.
- 734 20. Pehrson I, Das J, Idh N, *et al*. DNA methylomes derived from alveolar macrophages display  
735 distinct patterns in latent tuberculosis - implication for interferon gamma release assay status  
736 determination. 2021.
- 737 21. Wu Z, McGoogan JM. Characteristics of and Important Lessons From the Coronavirus Disease  
738 2019 (COVID-19) Outbreak in China. *JAMA*. 2020;323(13):1239-42.

- 739 22. Li J, Huang DQ, Zou B, *et al.* Epidemiology of COVID-19: A systematic review and  
740 meta-analysis of clinical characteristics, risk factors, and outcomes. *Journal of Medical*  
741 *Virology*. 2021;93(3):1449-58.
- 742 23. Chan Y-HH, Fong S-WW, Poh C-MM, *et al.* Asymptomatic COVID-19: disease tolerance with  
743 efficient anti-viral immunity against SARS-CoV-2. *EMBO molecular medicine*. 2021;13(6).
- 744 24. Verma D, Parasa VR, Raffetseder J, *et al.* Anti-mycobacterial activity correlates with altered  
745 DNA methylation pattern in immune cells from BCG-vaccinated subjects. *Scientific reports*.  
746 2017;7(1):12305.
- 747 25. Rizwan M, Rönnerberg B, Cistjakovs M, Lundkvist Å, Pipkorn R, Blomberg J. Serology in the  
748 Digital Age: Using Long Synthetic Peptides Created from Nucleic Acid Sequences as Antigens  
749 in Microarrays. *Microarrays*. 2016;5(3):22.
- 750 26. Nissen K, Hagbom M, Krambrich J, *et al.* Presymptomatic viral shedding and infective ability of  
751 SARS-CoV-2; a case report. *Heliyon*. 2021;7(2).
- 752 27. Aryee MJ, Jaffe AE, Corrada-Bravo H, *et al.* Minfi: a flexible and comprehensive Bioconductor  
753 package for the analysis of Infinium DNA methylation microarrays. *Bioinformatics (Oxford,*  
754 *England)*. 2014;30(10):1363-9.
- 755 28. Maksimovic J, Gordon L, Oshlack A. SWAN: Subset-quantile within array normalization for  
756 illumina infinium HumanMethylation450 BeadChips. *Genome biology*. 2012;13(6).
- 757 29. Morris TJ, Butcher LM, Feber A, *et al.* ChAMP: 450k Chip Analysis Methylation Pipeline.  
758 *Bioinformatics (Oxford, England)*. 2014;30(3):428-30.
- 759 30. Leek JT, Johnson EW, Parker HS, Jaffe AE, Storey JD. The sva package for removing batch  
760 effects and other unwanted variation in high-throughput experiments. *Bioinformatics*.  
761 2012;28(6):882-3.
- 762 31. Houseman EA, Accomando WP, Koestler DC, *et al.* DNA methylation arrays as surrogate  
763 measures of cell mixture distribution. *BMC bioinformatics*. 2012;13:86.
- 764 32. van Iterson M, van Zwet EW, Consortium B, Heijmans BT. Controlling bias and inflation in  
765 epigenome- and transcriptome-wide association studies using the empirical null distribution.  
766 *Genome Biology*. 2017;18(1):19.
- 767 33. Bader GD, Hogue CW. An automated method for finding molecular complexes in large protein  
768 interaction networks. *BMC bioinformatics*. 2003;4:2.
- 769 34. Szklarczyk D, Gable AL, Lyon D, *et al.* STRING v11: protein-protein association networks with  
770 increased coverage, supporting functional discovery in genome-wide experimental datasets.  
771 *Nucleic acids research*. 2019;47(D1).
- 772 35. de Weerd HA, Badam TVS, Martínez-Enguita D, *et al.* MODifieR: an ensemble R package for  
773 inference of disease modules from transcriptomics networks. *Bioinformatics (Oxford, England)*.  
774 2020;36(12):3918-9.
- 775 36. Zhou S, Zhang J, Xu J, *et al.* An epigenome-wide DNA methylation study of patients with  
776 COVID-19. *Annals of human genetics*. 2021.
- 777 37. Balnis J, Madrid A, Hogan KJ, *et al.* Blood DNA methylation and COVID-19 outcomes.  
778 *Clinical epigenetics*. 2021;13(1):118.
- 779 38. Castro de Moura M, Davalos V, Planas-Serra L, *et al.* Epigenome-wide association study of  
780 COVID-19 severity with respiratory failure. *EBioMedicine*. 2021;66:103339.
- 781 39. Corley MJ, Pang A, Dody K, *et al.* Genome-wide DNA methylation profiling of peripheral  
782 blood reveals an epigenetic signature associated with severe COVID-19. *Journal of Leukocyte*  
783 *Biology*. 2021.
- 784 40. Konigsberg IR, Barnes B, Campbell M, *et al.* Host methylation predicts SARS-CoV-2 infection  
785 and clinical outcome. *Communications Medicine*. 2021;1(1).
- 786 41. Vallée A, Lecarpentier Y, Vallée J-NN. Interplay of Opposing Effects of the WNT/ $\beta$ -Catenin  
787 Pathway and PPAR $\gamma$  and Implications for SARS-CoV2 Treatment. *Frontiers in immunology*.  
788 2021;12:666693.
- 789 42. Zheng F, Zhang S, Churas C, Pratt D, Bahar I, Ideker T. HiDeF: identifying persistent structures  
790 in multiscale 'omics data. *Genome biology*. 2021;22(1):21.
- 791 43. Blomberg J, Gottfries C-GG, Elfaitouri A, Rizwan M, Rosén A. Infection Elicited  
792 Autoimmunity and Myalgic Encephalomyelitis/Chronic Fatigue Syndrome: An Explanatory  
793 Model. *Frontiers in immunology*. 2018;9:229.
- 794 44. Skiba MA, Kruse AC. Autoantibodies as Endogenous Modulators of GPCR Signaling. *Trends in*  
795 *pharmacological sciences*. 2021;42(3):135-50.
- 796 45. Levine AJ. p53: 800 million years of evolution and 40 years of discovery. *Nature reviews*  
797 *Cancer*. 2020;20(8):471-80.



- 798 46. Vastrad B, Vastrad C, Tengli A. Identification of potential mRNA panels for severe acute  
799 respiratory syndrome coronavirus 2 (COVID-19) diagnosis and treatment using microarray  
800 dataset and bioinformatics methods. *3 Biotech*. 2020;10(10):422.
- 801 47. Wicik Z, Eyileten C, Jakubik D, *et al*. ACE2 Interaction Networks in COVID-19: A  
802 Physiological Framework for Prediction of Outcome in Patients with Cardiovascular Risk  
803 Factors. *Journal of clinical medicine*. 2020;9(11).
- 804 48. Xiong Y, Liu Y, Cao L, *et al*. Transcriptomic characteristics of bronchoalveolar lavage fluid and  
805 peripheral blood mononuclear cells in COVID-19 patients. *Emerging microbes & infections*.  
806 2020;9(1):761-70.
- 807 49. Tiwari R, Mishra AR, Gupta A, Nayak D. Structural similarity-based prediction of host factors  
808 associated with SARS-CoV-2 infection and pathogenesis. *Journal of biomolecular structure &  
809 dynamics*. 2021:1-12.
- 810 50. Mishra A, Chanchal S, Ashraf MZ. Host-Viral Interactions Revealed among Shared  
811 Transcriptomics Signatures of ARDS and Thrombosis: A Clue into COVID-19 Pathogenesis.  
812 *TH open : companion journal to thrombosis and haemostasis*. 2020;4(4).
- 813 51. Ma D, Liu S, Hu L, *et al*. Single-cell RNA sequencing identify SDCBP in ACE2-positive  
814 bronchial epithelial cells negatively correlates with COVID-19 severity. *Journal of cellular and  
815 molecular medicine*. 2021.
- 816 52. Kim MY, Shu Y, Carsillo T, *et al*. hsp70 and a novel axis of type I interferon-dependent  
817 antiviral immunity in the measles virus-infected brain. *Journal of virology*. 2013;87(2):998-  
818 1009.
- 819 53. Kim MY, Ma Y, Zhang Y, Li J, Shu Y, Oglesbee M. hsp70-dependent antiviral immunity  
820 against cytopathic neuronal infection by vesicular stomatitis virus. *Journal of virology*.  
821 2013;87(19):10668-78.
- 822 54. Tampere M, Pettke A, Salata C, *et al*. Novel Broad-Spectrum Antiviral Inhibitors Targeting  
823 Host Factors Essential for Replication of Pathogenic RNA Viruses. *Viruses*. 2020;12(12).
- 824
